# Supplementary material for: Periodontitis in elderly patients with type 2 diabetes mellitus: impact on gut microbiota and systemic inflammation
Source: publisher site journal article supplement (doi:10.18632/aging.202174), 2020-11-22
Supplement: Supplementary file [file aging-v12i24-202174-supplementary-material-SD1.pdf]

## SUPPLEMENTARY TABLES

**Supplementary Table 1.  $\alpha$ -Diversity indexes of gut microbiota among participants.**

|                          | Controls<br>(n = 29) | T2DM_NP<br>(n = 21) | T2DM_P<br>(n = 28) | <i>P</i> -value<br>Controls<br>(n=29)<br>vs<br>T2DM_NP<br>(n=21) | <i>P</i> -value<br>Controls<br>(n=29)<br>vs<br>T2DM_P<br>(n=28) | <i>P</i> -value<br>T2DM_NP<br>(n=21)<br>vs<br>T2DM_P<br>(n=28) | <i>P</i> -value<br>Controls (n=29)<br>vs<br>T2DM_NP<br>(n=21)<br>vs<br>T2DM_P (n=28) |
|--------------------------|----------------------|---------------------|--------------------|------------------------------------------------------------------|-----------------------------------------------------------------|----------------------------------------------------------------|--------------------------------------------------------------------------------------|
| <b>Observed<br/>OTUs</b> | 397.45±164.07        | 381.29±136.96       | 402.64±75.82       | 0.83                                                             | 0.69                                                            | 0.28                                                           | 0.64                                                                                 |
| <b>Chao1</b>             | 482.82±162.87        | 472.42±136.60       | 504.50±75.58       | 0.94                                                             | 0.25                                                            | 0.15                                                           | 0.63                                                                                 |
| <b>Shannon</b>           | 3.73±1.08            | 3.76±0.75           | 3.57±0.75          | 0.88                                                             | 0.33                                                            | 0.35                                                           | 0.89                                                                                 |
| <b>Simpson</b>           | 0.08±0.07            | 0.06±0.03           | 0.09±0.07          | 0.55                                                             | 0.36                                                            | 0.14                                                           | 0.70                                                                                 |

Abbreviations: T2DM\_P: patients with type 2 diabetes mellitus and periodontitis; T2DM\_NP: patients with type 2 diabetes mellitus alone (no periodontitis); OTUs: operational taxonomic units; ACE: abundance-based coverage estimator. *P*-values were calculated with Kruskal–Wallis tests.

**Supplementary Table 2. Variance inflation factor analyses of variables associated with microbiota (Figure1B).**

| Variables                     | VIF   |
|-------------------------------|-------|
| Number of teeth               | 5.03  |
| CPI                           | 4.92  |
| T2DM status                   | 3.09  |
| Age                           | 1.48  |
| Sex                           | 1.27  |
| BMI                           | 1.63  |
| Dry mouth                     | 2.59  |
| Duration of diabetes          | 12.89 |
| Hypertension                  | 9.30  |
| GI symptoms                   | 2.15  |
| Acarbose                      | 1.48  |
| Metformin                     | 1.61  |
| Aspirin                       | 2.16  |
| Statins                       | 1.66  |
| Calcium channel blockers      | 7.27  |
| Angiotensin receptor blockers | 2.71  |
| Pioglitazone                  | 1.73  |

Abbreviations: CPI: Community Periodontal Index; T2DM: type 2 diabetes mellitus; GI: gastrointestinal.

**Supplementary Table 3. Permutational multivariate analysis of variance, with or without confounder adjustment (Figure1B).**

|                                          | Bray-curtis | Unweighted Unifrac | Weighted Unifrac |
|------------------------------------------|-------------|--------------------|------------------|
| <b>(A) without confounder adjustment</b> |             |                    |                  |
| Controls (n = 29)                        |             |                    |                  |
| vs.                                      |             |                    |                  |
| T2DM_NP (n = 21)                         | 4E-3        | 4E-3               | 0.03             |
| vs.                                      |             |                    |                  |
| T2DM_P (n = 28)                          |             |                    |                  |
| <b>(B) All subjects</b>                  |             |                    |                  |
| Controls (n = 29)                        |             |                    |                  |
| vs.                                      |             |                    |                  |
| T2DM_NP (n = 21)                         | 4E-3        | 4E-3               | 0.03             |
| vs.                                      |             |                    |                  |
| T2DM_P (n = 28)                          |             |                    |                  |
| Age                                      | 0.54        | 0.29               | 0.10             |
| Sex                                      | 0.93        | 0.87               | 0.29             |
| GI symptoms                              | 0.20        | 0.19               | 0.25             |
| Acarbose                                 | 0.01        | 0.01               | 0.61             |
| Pioglitazone                             | 0.97        | 0.99               | 0.93             |
| Metformin                                | 0.76        | 0.84               | 0.66             |
| Statins                                  | 0.45        | 0.58               | 0.37             |
| <b>(C) Within T2DM subjects</b>          |             |                    |                  |
| T2DM_NP (n = 21)                         |             |                    |                  |
| vs.                                      | 6E-3        | 0.01               | 6E-4             |
| T2DM_P (n = 28)                          |             |                    |                  |
| Age                                      | 0.54        | 0.51               | 0.07             |
| Sex                                      | 0.56        | 0.50               | 0.33             |
| GI symptoms                              | 0.17        | 0.13               | 0.77             |
| Acarbose                                 | 0.05        | 0.04               | 0.03             |
| Pioglitazone                             | 0.91        | 0.96               | 0.93             |
| Metformin                                | 0.60        | 0.66               | 0.39             |
| Statins                                  | 0.55        | 0.76               | 0.11             |

Abbreviations: T2DM\_P: patients with type 2 diabetes mellitus and periodontitis; T2DM\_NP: patients with type 2 diabetes mellitus alone (no periodontitis).

**Supplementary Table 4. Details on PICRUSt prediction (Figure 1E).**

| <b>KEGG_Description</b>                                                                                                                                           | <b>KEGG</b> | <b>Eta-squared</b> | <b>P-value</b> | <b>Corrected P-value</b> |
|-------------------------------------------------------------------------------------------------------------------------------------------------------------------|-------------|--------------------|----------------|--------------------------|
| NADH dehydrogenase I subunit F [EC:1.6.5.3]; NADH-quinone oxidoreductase subunit F [EC:1.6.5.3]                                                                   | g4033       | 0.278              | 1.20E-06       | 9.97E-05                 |
| acetyl-CoA carboxylase biotin carboxyl carrier protein                                                                                                            | g6191       | 0.259              | 5.10E-06       | 2.12E-04                 |
| NADH-quinone oxidoreductase subunit E [EC:1.6.5.3]; NADH dehydrogenase I subunit E [EC:1.6.5.3]                                                                   | g4034       | 0.281              | 1.10E-05       | 3.03E-04                 |
| DNA-directed RNA polymerase subunit omega [EC:2.7.7.6]                                                                                                            | g1676       | 0.193              | 2.39E-05       | 4.96E-04                 |
| threonine dehydratase [EC:4.3.1.19]                                                                                                                               | g2801       | 0.251              | 2.86E-05       | 4.75E-04                 |
| peptide/nickel transport system ATP-binding protein                                                                                                               | g5254       | 0.144              | 3.51E-05       | 4.85E-04                 |
| acetolactate synthase I/II/III large subunit [EC:2.2.1.6]                                                                                                         | g3654       | 0.232              | 4.09E-05       | 4.85E-04                 |
| putative endonuclease                                                                                                                                             | g1179       | 0.163              | 5.13E-05       | 5.33E-04                 |
| cob(I)alamin adenosyltransferase [EC:2.5.1.17]                                                                                                                    | g5815       | 0.249              | 5.25E-05       | 4.84E-04                 |
| peptide/nickel transport system substrate-binding protein                                                                                                         | g5257       | 0.164              | 5.68E-05       | 4.71E-04                 |
| peptide/nickel transport system permease protein                                                                                                                  | g5255       | 0.151              | 9.13E-05       | 6.89E-04                 |
| myo-inositol-1-phosphate synthase [EC:5.5.1.4]                                                                                                                    | g4460       | 0.191              | 1.13E-04       | 7.83E-04                 |
| pyrophosphate--fructose-6-phosphate 1-phosphotransferase [EC:2.7.1.90]                                                                                            | g1538       | 0.211              | 1.15E-04       | 7.36E-04                 |
| rod shape-determining protein MreD                                                                                                                                | g4647       | 0.131              | 1.88E-04       | 1.12E-03                 |
| dipeptidyl-peptidase III [EC:3.4.14.4]                                                                                                                            | g2471       | 0.18               | 2.53E-04       | 1.40E-03                 |
| dipeptidyl-peptidase 4 [EC:3.4.14.5]                                                                                                                              | g2476       | 0.188              | 2.62E-04       | 1.36E-03                 |
| type II pantothenate kinase [EC:2.7.1.33]                                                                                                                         | g786        | 0.222              | 2.74E-04       | 1.34E-03                 |
| putative endopeptidase [EC:3.4.24.-]                                                                                                                              | g6607       | 0.206              | 2.87E-04       | 1.32E-03                 |
| phosphotransferase system, enzyme I, PtsI [EC:2.7.3.9]                                                                                                            | g943        | 0.173              | 2.89E-04       | 1.26E-03                 |
| DNA polymerase III subunit epsilon [EC:2.7.7.7]                                                                                                                   | g4232       | 0.195              | 3.10E-04       | 1.28E-03                 |
| 7-cyano-7-deazaguanine reductase [EC:1.7.1.13]                                                                                                                    | g1148       | 0.162              | 7.13E-04       | 2.82E-03                 |
| chorismate mutase [EC:5.4.99.5]                                                                                                                                   | g4136       | 0.157              | 7.17E-04       | 2.71E-03                 |
| lysozyme                                                                                                                                                          | g2842       | 0.229              | 7.51E-04       | 2.71E-03                 |
| D-alanyl-D-alanine dipeptidase [EC:3.4.13.22];D-alanyl-D-alanine dipeptidase [EC:3.4.13.-]                                                                        | g2444       | 0.184              | 9.03E-04       | 3.12E-03                 |
| peptidyl-dipeptidase Dcp [EC:3.4.15.5]                                                                                                                            | g5103       | 0.168              | 9.07E-04       | 3.01E-03                 |
| phosphate butyryltransferase [EC:2.3.1.19]                                                                                                                        | g1485       | 0.151              | 9.97E-04       | 3.18E-03                 |
| mannose-1-phosphate guanylyltransferase [EC:2.7.7.22]                                                                                                             | g6780       | 0.136              | 1.63E-03       | 5.01E-03                 |
| pyruvate carboxylase subunit B [EC:6.4.1.1]                                                                                                                       | g1706       | 0.129              | 1.76E-03       | 5.22E-03                 |
| Lrp/AsnC family transcriptional regulator, regulator for asnA, asnC and gidA                                                                                      | g4669       | 0.171              | 2.45E-03       | 7.01E-03                 |
| hypothetical protein                                                                                                                                              | g3162       | 0.17               | 2.49E-03       | 6.90E-03                 |
| curved DNA-binding protein                                                                                                                                        | g5998       | 0.106              | 2.55E-03       | 6.84E-03                 |
| GDP-L-fucose synthase [EC:1.1.1.271]                                                                                                                              | g1238       | 0.094              | 2.69E-03       | 6.98E-03                 |
| 2-amino-4-hydroxy-6-hydroxymethylidihydropteridine pyrophosphokinase [EC:2.7.6.3];2-amino-4-hydroxy-6-hydroxymethylidihydropteridine diphosphokinase [EC:2.7.6.3] | g6519       | 0.136              | 2.78E-03       | 6.99E-03                 |
| manganese transport protein                                                                                                                                       | g6034       | 0.167              | 3.26E-03       | 7.95E-03                 |

|                                                                                                                                                                                                     |       |       |          |          |
|-----------------------------------------------------------------------------------------------------------------------------------------------------------------------------------------------------|-------|-------|----------|----------|
| carbamate kinase [EC:2.7.2.2]                                                                                                                                                                       | g2715 | 0.123 | 3.58E-03 | 8.49E-03 |
| PhnP protein                                                                                                                                                                                        | g6107 | 0.113 | 3.69E-03 | 8.51E-03 |
| UDP-N-acetylglucosamine acyltransferase [EC:2.3.1.129]                                                                                                                                              | g1040 | 0.144 | 4.97E-03 | 1.10E-02 |
| topoisomerase IV subunit B [EC:5.99.1.-]                                                                                                                                                            | g156  | 0.133 | 5.23E-03 | 1.10E-02 |
| topoisomerase IV subunit A [EC:5.99.1.-]                                                                                                                                                            | g4626 | 0.134 | 5.23E-03 | 1.10E-02 |
| starvation-inducible DNA-binding protein                                                                                                                                                            | g5676 | 0.132 | 5.31E-03 | 1.10E-02 |
| arylsulfatase [EC:3.1.6.1]                                                                                                                                                                          | g3556 | 0.089 | 5.39E-03 | 1.10E-02 |
| replicative DNA helicase [EC:3.6.4.12];replicative DNA helicase [EC:3.6.1.-]                                                                                                                        | g499  | 0.153 | 5.96E-03 | 1.20E-02 |
| aspartate aminotransferase [EC:2.6.1.1]                                                                                                                                                             | g604  | 0.096 | 6.37E-03 | 1.20E-02 |
| carboxyl-terminal processing protease [EC:3.4.21.102]                                                                                                                                               | g5632 | 0.068 | 8.02E-03 | 1.50E-02 |
| Fe-S cluster assembly protein SufB                                                                                                                                                                  | g5827 | 0.079 | 1.00E-02 | 1.90E-02 |
| type II restriction enzyme [EC:3.1.21.4]                                                                                                                                                            | g6230 | 0.053 | 1.10E-02 | 2.00E-02 |
| levanase [EC:3.2.1.65]                                                                                                                                                                              | g2700 | 0.07  | 1.10E-02 | 1.90E-02 |
| cell division protein FtsA                                                                                                                                                                          | g4371 | 0.117 | 1.10E-02 | 2.00E-02 |
| L-asparaginase [EC:3.5.1.1]                                                                                                                                                                         | g2597 | 0.075 | 1.20E-02 | 2.00E-02 |
| rod shape determining protein RodA                                                                                                                                                                  | g3761 | 0.059 | 1.50E-02 | 2.00E-02 |
| HlyD family secretion protein                                                                                                                                                                       | g4321 | 0.09  | 1.50E-02 | 2.50E-02 |
| monovalent cation:H <sup>+</sup> antiporter-2, CPA2 family                                                                                                                                          | g3393 | 0.086 | 1.60E-02 | 2.40E-02 |
| 1,4-dihydroxy-2-naphthoate octaprenyltransferase [EC:2.5.1.74];1,4-dihydroxy-2-naphthoate octaprenyltransferase [EC:2.5.1.74 2.5.1.-];1,4-dihydroxy-2-naphthoate octaprenyltransferase [EC:2.5.1.-] | g2953 | 0.086 | 1.70E-02 | 2.50E-02 |
| aminoacylhistidine dipeptidase [EC:3.4.13.3];dipeptidase D [EC:3.4.13.-]                                                                                                                            | g2475 | 0.068 | 2.10E-02 | 2.60E-02 |
| N-carbamoylputrescine amidase [EC:3.5.1.53]                                                                                                                                                         | g6715 | 0.114 | 2.20E-02 | 2.60E-02 |
| GMP synthase (glutamine-hydrolysing) [EC:6.3.5.2]                                                                                                                                                   | g4870 | 0.11  | 2.40E-02 | 3.10E-02 |
| ATP-dependent DNA helicase RecQ [EC:3.6.1.-];ATP-dependent DNA helicase RecQ [EC:3.6.4.12]                                                                                                          | g3699 | 0.06  | 2.80E-02 | 3.20E-02 |
| 2',3'-cyclic-nucleotide 2'-phosphodiesterase [EC:3.1.4.16]                                                                                                                                          | g3247 | 0.082 | 2.80E-02 | 3.50E-02 |
| phosphate:Na <sup>+</sup> symporter;phosphate:Na <sup>+</sup> symporter, PNaS family                                                                                                                | g6033 | 0.083 | 3.90E-02 | 4.00E-02 |

**Supplementary Table 5: Mean relative abundances of bacterial operational taxonomic units among groups (Figure 3).**

|                                     | Controls<br>(n=29) |        | T2DM_NP<br>(n=21) |        | T2DM_P<br>(n=28) |        | P-value<br>Controls (n=29)<br>vs<br>T2DM_P (n=28) |                              | P-value<br>T2DM_NP (n=21)<br>vs<br>T2DM_P (n=28) |                              |
|-------------------------------------|--------------------|--------|-------------------|--------|------------------|--------|---------------------------------------------------|------------------------------|--------------------------------------------------|------------------------------|
|                                     | Mean               | SD     | Mean              | SD     | Mean             | SD     | T.text                                            | Adjusted<br>GLM <sup>a</sup> | T.text                                           | Adjusted<br>GLM <sup>a</sup> |
| <b>Species</b>                      |                    |        |                   |        |                  |        |                                                   |                              |                                                  |                              |
| <i>Prevotella copri</i>             | 0.0619             | 0.061  | 0.1008            | 0.1510 | 0.2071           | 0.1925 | < 0.001 <sup>FDR</sup>                            | < 0.001                      | 0.037 <sup>FDR</sup>                             | 0.043                        |
| <i>Blautia wexlerae</i>             | 0.0024             | 0.0029 | 0.0011            | 0.0007 | 0.0011           | 0.0006 | 0.022                                             | 0.012                        | -                                                | -                            |
| <i>Faecalibacterium prausnitzii</i> | 0.0772             | 0.0813 | 0.0757            | 0.0432 | 0.0504           | 0.0273 | 0.028                                             | 0.008                        | 0.044                                            | 0.007                        |
| <i>Coprococcus eutactus</i>         | 0.0045             | 0.0057 | 0.0026            | 0.0023 | 0.0053           | 0.0060 | 0.036                                             | 0.021                        | -                                                | 0.022                        |
| <i>Flavonifractor plautii</i>       | 0.0019             | 0.0028 | 0.0008            | 0.0005 | 0.0012           | 0.0007 | 0.039                                             | 0.036                        | -                                                | 0.017                        |
| <b>Genus</b>                        |                    |        |                   |        |                  |        |                                                   |                              |                                                  |                              |
| <i>Prevotella</i>                   | 0.0711             | 0.0636 | 0.1076            | 0.1589 | 0.2174           | 0.1955 | < 0.001 <sup>FDR</sup>                            | < 0.001                      | 0.032 <sup>FDR</sup>                             | 0.043                        |
| <i>Blautia</i>                      | 0.0024             | 0.0029 | 0.0011            | 0.0007 | 0.0011           | 0.0006 | 0.022                                             | 0.012                        | -                                                | -                            |
| <i>Faecalibacterium</i>             | 0.0772             | 0.0813 | 0.0757            | 0.0432 | 0.0505           | 0.0273 | 0.028                                             | 0.008                        | 0.044                                            | 0.007                        |
| <b>Family</b>                       |                    |        |                   |        |                  |        |                                                   |                              |                                                  |                              |
| <i>Prevotellaceae</i>               | 0.0752             | 0.0645 | 0.1129            | 0.1578 | 0.2278           | 0.2061 | < 0.001 <sup>FDR</sup>                            | < 0.001                      | 0.034 <sup>FDR</sup>                             | 0.041                        |
| <i>Fusobacteriaceae</i>             | 0.0271             | 0.0540 | 0.0143            | 0.0367 | 0.0049           | 0.0064 | 0.036                                             | 0.033                        | -                                                | -                            |
| <i>Ruminococcaceae</i>              | 0.1607             | 0.1090 | 0.1592            | 0.0850 | 0.1123           | 0.0645 | 0.046                                             | 0.037                        | 0.043                                            | 0.023                        |
| <b>Order</b>                        |                    |        |                   |        |                  |        |                                                   |                              |                                                  |                              |
| <i>Bacteroidales</i>                | 0.2822             | 0.0978 | 0.3803            | 0.1600 | 0.4355           | 0.1328 | < 0.001 <sup>FDR</sup>                            | < 0.001                      | -                                                | -                            |
| <i>Clostridiales</i>                | 0.3522             | 0.1496 | 0.3402            | 0.1077 | 0.2657           | 0.1045 | 0.014 <sup>FDR</sup>                              | 0.031                        | 0.021                                            | 0.016                        |
| <i>Fusobacteriales</i>              | 0.0271             | 0.0540 | 0.0143            | 0.0367 | 0.0049           | 0.0064 | 0.036                                             | 0.033                        | -                                                | -                            |
| <b>Class</b>                        |                    |        |                   |        |                  |        |                                                   |                              |                                                  |                              |
| <i>Bacteroidia</i>                  | 0.2822             | 0.0978 | 0.4115            | 0.1400 | 0.4121           | 0.1546 | < 0.001 <sup>FDR</sup>                            | < 0.001                      | -                                                | -                            |
| <b>Phylum</b>                       |                    |        |                   |        |                  |        |                                                   |                              |                                                  |                              |
| <i>Bacteroidetes</i>                | 0.2822             | 0.0978 | 0.3803            | 0.16   | 0.4355           | 0.1328 | < 0.001 <sup>FDR</sup>                            | < 0.001                      | -                                                | -                            |
| <i>Fusobacteria</i>                 | 0.0271             | 0.054  | 0.0143            | 0.0367 | 0.0049           | 0.0064 | 0.036                                             | 0.033                        | -                                                | -                            |

Mean relative abundances are shown as percentage values.

Adjusted GLM<sup>a</sup>: significance adjusted for age, sex, and acarbose use, tested using GLM.

FDR < 0.05.

Abbreviations: T2DM\_P, patients with type 2 diabetes mellitus and periodontitis; T2DM\_NP, patients with type 2 diabetes mellitus alone (no periodontitis); SD, standard deviation; GLM, generalized linear model.

**Supplementary Table 6. Forward selection analyses of variables associated with microbiota (Figure 4A).**

| <b>Variables</b> | <b>AIC</b> | <b>F</b> | <b>P</b> |
|------------------|------------|----------|----------|
| Number of teeth  | -99.19     | 3.49     | 3E-3     |
| CPI              | -98.00     | 2.28     | 0.02     |
| Acarbose         | -97.32     | 1.60     | 0.09     |
| Age              | -97.04     | 1.32     | 0.19     |
| Sex              | -96.75     | 1.03     | 0.40     |
| GI symptoms      | -96.63     | 0.91     | 0.50     |
| Statins          | -96.62     | 0.90     | 0.51     |
| Metformin        | -96.31     | 0.60     | 0.84     |
| Pioglitazone     | -96.17     | 0.46     | 0.97     |

Abbreviations: AIC, Akaike information criterion; CPI, Community Periodontal Index.

**Supplementary Table 7. Details on the clinical correlates of gut microbiota at genus level (Figure 4B).**

| <b>Spearman's P</b>         | <b>HbA1c</b> | <b>FBG</b> | <b>TG</b> | <b>TCHO</b> | <b>HDL-c</b> | <b>LDL-c</b> | <b>VLDL-c</b> | <b>PGE<sub>2</sub></b> | <b>LXA<sub>4</sub></b> | <b>LTB<sub>4</sub></b> | <b>TNF<math>\alpha</math></b> | <b>IL-6</b> | <b>IFN-<math>\gamma</math></b> | <b>IL-17</b> | <b>IL-22</b> | <b>BALP</b> | <b>OC</b> |
|-----------------------------|--------------|------------|-----------|-------------|--------------|--------------|---------------|------------------------|------------------------|------------------------|-------------------------------|-------------|--------------------------------|--------------|--------------|-------------|-----------|
| <i>Age</i>                  | 0.640        | 0.835      | 0.694     | 0.442       | 0.158        | 0.695        | 0.219         | 0.918                  | 0.822                  | 0.286                  | 0.565                         | 0.630       | 0.850                          | 0.274        | 0.336        | 0.756       | 0.943     |
| <i>Sex</i>                  | 0.663        | 0.448      | 0.366     | 0.004       | 0.002        | 0.476        | 0.806         | 0.085                  | 0.282                  | 0.524                  | 0.535                         | 0.573       | 0.344                          | 0.608        | 0.802        | 0.022       | 0.072     |
| <i>Hypertension</i>         | 0.002        | 0.142      | 0.874     | 0.544       | 0.034        | 0.403        | 0.792         | 0.235                  | 0.753                  | 0.889                  | 0.758                         | 0.747       | 0.515                          | 0.889        | 0.770        | 0.684       | 0.585     |
| <i>Duration of diabetes</i> | 0.000        | 0.000      | 0.001     | 0.388       | 0.121        | 0.413        | 0.044         | 0.053                  | 0.313                  | 0.724                  | 0.012                         | 0.878       | 0.595                          | 0.016        | 0.005        | 0.029       | 0.048     |
| <i>CPI</i>                  | 0.000        | 0.000      | 0.048     | 0.558       | 0.333        | 0.983        | 0.552         | 0.000                  | 0.836                  | 0.678                  | 0.010                         | 0.029       | 0.009                          | 0.047        | 0.016        | 0.001       | 0.008     |
| <i>Number of teeth</i>      | 0.000        | 0.000      | 0.024     | 0.888       | 0.038        | 0.796        | 0.109         | 0.003                  | 0.873                  | 0.976                  | 0.128                         | 0.073       | 0.409                          | 0.303        | 0.015        | 0.028       | 0.085     |
| <i>Dry mouth</i>            | 0.599        | 0.718      | 0.610     | 0.902       | 0.140        | 0.510        | 0.917         | 0.030                  | 0.601                  | 0.155                  | 0.297                         | 0.047       | 0.110                          | 0.018        | 0.309        | 0.677       | 0.436     |
| <i>GI symptoms</i>          | 0.005        | 0.021      | 0.007     | 0.664       | 0.438        | 0.442        | 0.165         | 0.673                  | 0.725                  | 0.883                  | 0.089                         | 0.153       | 0.464                          | 0.797        | 0.239        | 0.263       | 0.188     |

**Supplementary Table 8. Details on the clinical correlates of gut microbiota at genus level (Figure 4B).**

| <b>Spearman's <i>r</i></b>  | <b>HbA1c</b> | <b>FBG</b> | <b>TG</b> | <b>TCHO</b> | <b>HDL-c</b> | <b>LDL-c</b> | <b>VLDL-c</b> | <b>PGE<sub>2</sub></b> | <b>LXA<sub>4</sub></b> | <b>LTB<sub>4</sub></b> | <b>TNF<math>\alpha</math></b> | <b>IL-6</b> | <b>IFN-<math>\gamma</math></b> | <b>IL-17</b> | <b>IL-22</b> | <b>BALP</b> | <b>OC</b> |
|-----------------------------|--------------|------------|-----------|-------------|--------------|--------------|---------------|------------------------|------------------------|------------------------|-------------------------------|-------------|--------------------------------|--------------|--------------|-------------|-----------|
| <i>Age</i>                  | -0.054       | 0.024      | -0.045    | 0.088       | 0.162        | -0.045       | -0.141        | 0.012                  | -0.026                 | 0.122                  | 0.066                         | -0.055      | 0.022                          | 0.126        | -0.110       | -0.036      | -0.008    |
| <i>Sex</i>                  | 0.050        | -0.087     | 0.104     | -0.319      | -0.339       | -0.082       | 0.028         | 0.196                  | -0.123                 | 0.073                  | -0.071                        | 0.065       | 0.109                          | 0.059        | 0.029        | -0.260      | -0.205    |
| <i>Hypertension</i>         | 0.345        | 0.168      | 0.018     | -0.070      | -0.241       | 0.096        | 0.030         | 0.136                  | -0.036                 | -0.016                 | 0.035                         | 0.037       | 0.075                          | -0.016       | 0.034        | 0.047       | 0.063     |
| <i>Duration of diabetes</i> | 0.698        | 0.719      | 0.373     | 0.099       | -0.177       | 0.094        | 0.229         | 0.220                  | -0.116                 | -0.041                 | 0.283                         | 0.018       | 0.061                          | 0.271        | 0.318        | 0.247       | 0.224     |
| <i>CPI</i>                  | 0.592        | 0.401      | 0.225     | 0.067       | -0.111       | -0.002       | 0.068         | 0.409                  | 0.024                  | 0.048                  | 0.288                         | 0.248       | 0.292                          | 0.226        | 0.273        | 0.368       | 0.300     |
| <i>Number of teeth</i>      | -0.556       | -0.466     | -0.255    | -0.016      | 0.235        | 0.030        | -0.183        | -0.332                 | -0.018                 | 0.004                  | -0.174                        | -0.204      | -0.095                         | -0.118       | -0.274       | -0.249      | -0.197    |
| <i>Dry mouth</i>            | -0.060       | -0.042     | 0.059     | 0.014       | -0.169       | 0.076        | 0.012         | -0.246                 | -0.060                 | -0.163                 | -0.120                        | -0.226      | -0.182                         | -0.268       | 0.117        | -0.048      | -0.089    |
| <i>GI symptoms</i>          | 0.313        | 0.262      | 0.301     | 0.050       | -0.089       | 0.088        | 0.159         | 0.048                  | -0.041                 | -0.017                 | 0.194                         | -0.164      | 0.084                          | -0.030       | 0.135        | 0.128       | 0.151     |

**Supplementary Table 9. Details on the relationships of altered gut microbiota and peripheral risk markers in elderly individuals (Figure 5G).**

| Spearman's r       | HbA1c  | FBG    | TG     | TCHO   | HDL-c  | LDL-c  | VLDL-c | PGE <sub>2</sub> | LXA <sub>4</sub> | LTB <sub>4</sub> | TNF $\alpha$ | IL-6   | IFN- $\gamma$ | IL-17  | IL-22  | BALP   | OC     |
|--------------------|--------|--------|--------|--------|--------|--------|--------|------------------|------------------|------------------|--------------|--------|---------------|--------|--------|--------|--------|
| Blautia            | -0.156 | -0.255 | -0.137 | -0.073 | 0.133  | -0.094 | -0.067 | -0.270           | 0.083            | 0.025            | -0.148       | -0.038 | -0.043        | -0.076 | -0.207 | -0.040 | -0.027 |
| Cloacibacillus     | -0.140 | -0.072 | 0.029  | 0.138  | -0.035 | 0.129  | 0.177  | -0.142           | 0.167            | -0.136           | 0.295        | -0.247 | 0.054         | -0.125 | 0.239  | -0.041 | -0.028 |
| Eisenbergiella     | -0.168 | -0.077 | -0.158 | -0.114 | 0.263  | -0.269 | -0.127 | -0.296           | -0.124           | -0.057           | 0.187        | -0.257 | 0.033         | 0.088  | -0.077 | -0.009 | -0.038 |
| Pseudobutyrvibrio  | 0.125  | -0.044 | -0.181 | -0.003 | 0.001  | -0.014 | -0.063 | -0.049           | -0.014           | -0.101           | 0.053        | 0.020  | 0.009         | -0.063 | -0.041 | 0.085  | 0.055  |
| Coprobacillus      | 0.035  | -0.098 | -0.035 | -0.226 | -0.125 | -0.221 | -0.122 | 0.043            | -0.131           | -0.014           | 0.201        | -0.086 | 0.054         | 0.128  | -0.032 | 0.005  | -0.032 |
| Faecalibacterium   | -0.031 | -0.109 | -0.097 | -0.013 | 0.052  | -0.077 | 0.063  | -0.320           | 0.004            | -0.106           | -0.036       | -0.044 | -0.275        | 0.048  | -0.205 | -0.204 | -0.197 |
| Anaerobiospirillum | -0.166 | -0.132 | 0.031  | -0.108 | -0.090 | -0.070 | 0.076  | -0.163           | 0.065            | -0.131           | -0.085       | -0.297 | -0.109        | -0.141 | 0.148  | 0.106  | 0.136  |
| Christensenella    | -0.240 | -0.228 | -0.113 | 0.119  | 0.211  | -0.066 | 0.018  | -0.193           | 0.086            | 0.129            | 0.162        | -0.057 | -0.023        | 0.032  | 0.067  | 0.145  | 0.165  |
| Acholeplasma       | -0.039 | 0.071  | -0.004 | -0.129 | -0.073 | -0.030 | -0.027 | -0.129           | 0.199            | -0.154           | 0.081        | -0.205 | 0.238         | -0.166 | -0.015 | -0.107 | -0.079 |
| Eubacterium        | -0.080 | -0.115 | -0.159 | -0.117 | 0.066  | -0.173 | -0.047 | -0.147           | 0.133            | -0.099           | 0.193        | -0.137 | -0.150        | -0.030 | 0.067  | -0.188 | -0.207 |
| Flavonifractor     | -0.037 | -0.161 | -0.126 | 0.098  | 0.255  | -0.059 | -0.084 | -0.034           | -0.136           | -0.039           | 0.173        | -0.055 | 0.042         | 0.069  | 0.075  | 0.101  | 0.080  |
| Odoribacter        | -0.209 | -0.155 | -0.188 | -0.021 | -0.096 | 0.017  | 0.097  | -0.183           | 0.130            | -0.019           | 0.105        | -0.116 | -0.031        | 0.101  | 0.147  | -0.189 | -0.132 |
| Oxalobacter        | -0.273 | -0.333 | -0.361 | -0.121 | 0.251  | -0.108 | -0.151 | 0.057            | -0.059           | -0.023           | -0.098       | -0.112 | -0.089        | -0.105 | -0.073 | 0.045  | 0.074  |
| Clostridium_XIVa   | -0.182 | -0.164 | 0.003  | 0.301  | 0.167  | 0.213  | 0.111  | -0.167           | 0.014            | 0.116            | 0.007        | -0.229 | 0.125         | 0.056  | 0.030  | -0.083 | -0.054 |
| Anaerofilum        | -0.045 | -0.158 | -0.252 | -0.008 | -0.015 | 0.030  | -0.083 | -0.193           | 0.037            | 0.037            | -0.170       | 0.139  | -0.046        | 0.200  | -0.146 | -0.176 | -0.146 |
| Fusobacterium      | -0.186 | -0.215 | 0.109  | 0.226  | 0.205  | 0.057  | 0.112  | 0.067            | -0.011           | 0.083            | 0.091        | -0.175 | -0.021        | -0.042 | 0.063  | -0.024 | -0.012 |
| Collinsella        | 0.187  | 0.102  | 0.268  | -0.103 | -0.082 | -0.118 | 0.030  | -0.129           | -0.076           | -0.069           | 0.267        | -0.126 | -0.038        | 0.092  | 0.288  | -0.121 | -0.105 |
| Parabacteroides    | 0.062  | 0.011  | 0.116  | -0.058 | 0.081  | -0.141 | -0.004 | 0.026            | -0.184           | -0.038           | 0.243        | -0.142 | 0.083         | 0.085  | 0.119  | -0.099 | -0.081 |
| Alistipes          | -0.070 | -0.002 | -0.161 | 0.045  | 0.154  | -0.051 | 0.003  | -0.208           | 0.065            | -0.146           | 0.178        | -0.194 | 0.092         | 0.079  | 0.037  | -0.009 | 0.002  |
| Haemophilus        | 0.245  | 0.119  | 0.050  | 0.021  | -0.122 | 0.080  | 0.090  | -0.039           | 0.010            | -0.054           | -0.104       | 0.008  | 0.126         | 0.133  | 0.097  | 0.063  | 0.058  |
| Gemmiger           | 0.045  | 0.075  | -0.085 | -0.016 | 0.036  | -0.023 | 0.018  | -0.188           | 0.031            | -0.112           | -0.128       | -0.020 | 0.025         | 0.075  | -0.015 | -0.012 | -0.022 |
| Paraprevotella     | -0.035 | -0.004 | 0.102  | 0.200  | 0.041  | 0.124  | 0.217  | -0.007           | 0.073            | -0.078           | 0.058        | -0.319 | 0.143         | -0.092 | 0.159  | -0.045 | -0.063 |
| Holdemanella       | 0.196  | 0.083  | -0.006 | -0.174 | -0.240 | -0.013 | -0.034 | -0.039           | -0.014           | -0.086           | 0.033        | 0.060  | 0.008         | 0.139  | 0.128  | -0.226 | -0.201 |
| Prevotella         | 0.205  | 0.086  | 0.036  | 0.136  | -0.110 | 0.225  | 0.139  | 0.112            | 0.200            | -0.035           | -0.156       | 0.112  | -0.024        | -0.059 | 0.200  | -0.022 | -0.004 |
| Aggregatibacter    | 0.268  | 0.179  | 0.078  | 0.145  | -0.029 | 0.106  | 0.125  | 0.240            | -0.126           | -0.034           | -0.140       | 0.234  | -0.050        | -0.023 | -0.004 | 0.038  | 0.038  |
| Sutterella         | 0.231  | 0.336  | 0.119  | 0.153  | -0.134 | 0.222  | 0.034  | 0.094            | 0.086            | -0.182           | 0.138        | -0.046 | 0.181         | 0.076  | 0.234  | 0.095  | 0.103  |
| Unassigned         | 0.094  | 0.226  | 0.036  | 0.020  | 0.092  | -0.170 | 0.056  | -0.077           | 0.074            | 0.075            | 0.277        | 0.016  | 0.024         | 0.201  | 0.227  | 0.001  | -0.084 |
| Dialister          | 0.199  | 0.326  | 0.096  | -0.026 | -0.072 | -0.148 | 0.066  | 0.079            | 0.172            | -0.068           | 0.248        | -0.003 | 0.024         | 0.075  | 0.119  | 0.210  | 0.173  |
| Howardella         | 0.114  | 0.027  | -0.035 | -0.107 | -0.152 | 0.003  | 0.030  | 0.129            | 0.177            | -0.098           | 0.051        | 0.157  | -0.168        | -0.114 | 0.151  | -0.032 | -0.015 |
| Streptococcus      | 0.176  | 0.038  | -0.089 | -0.015 | -0.044 | 0.018  | 0.016  | 0.137            | -0.008           | 0.093            | -0.136       | 0.136  | 0.167         | 0.093  | 0.039  | 0.116  | 0.081  |
| Alloprevotella     | 0.140  | 0.060  | -0.096 | -0.201 | -0.098 | -0.106 | -0.155 | 0.119            | 0.040            | 0.003            | 0.056        | 0.035  | 0.032         | 0.027  | 0.094  | 0.171  | 0.144  |
| Bacteroides        | -0.034 | 0.037  | 0.068  | -0.004 | 0.087  | -0.158 | 0.026  | -0.074           | -0.056           | 0.080            | 0.133        | -0.176 | 0.183         | 0.114  | 0.025  | 0.108  | 0.061  |
| Veillonella        | 0.275  | 0.193  | -0.025 | 0.071  | -0.064 | 0.059  | 0.049  | 0.115            | -0.055           | -0.053           | -0.154       | 0.203  | 0.212         | 0.251  | -0.008 | 0.125  | 0.073  |
| Dorea              | 0.150  | -0.005 | 0.054  | 0.142  | -0.019 | 0.148  | 0.116  | 0.055            | 0.063            | -0.072           | -0.018       | 0.082  | -0.225        | -0.020 | 0.069  | 0.027  | 0.058  |



**Supplementary Table 10. Details on the relationships of altered gut microbiota and peripheral risk markers in elderly individuals (Figure 5G).**

| Spearman's P              | HbA1c | FBG   | TG    | TCHO  | HDL-c | LDL-c | VLDL-c | PGE <sub>2</sub> | LXA <sub>4</sub> | LTB <sub>4</sub> | TNF $\alpha$ | IL-6  | IFN- $\gamma$ | IL-17 | IL-22 | BALP  | OC    |
|---------------------------|-------|-------|-------|-------|-------|-------|--------|------------------|------------------|------------------|--------------|-------|---------------|-------|-------|-------|-------|
| <i>Blautia</i>            | 0.173 | 0.024 | 0.232 | 0.527 | 0.244 | 0.413 | 0.559  | 0.017            | 0.467            | 0.829            | 0.197        | 0.739 | 0.707         | 0.510 | 0.068 | 0.726 | 0.811 |
| <i>Cloacibacillus</i>     | 0.221 | 0.528 | 0.804 | 0.227 | 0.764 | 0.261 | 0.120  | 0.214            | 0.144            | 0.236            | 0.009        | 0.029 | 0.637         | 0.275 | 0.035 | 0.725 | 0.805 |
| <i>Eisenbergiella</i>     | 0.143 | 0.502 | 0.168 | 0.320 | 0.020 | 0.017 | 0.270  | 0.008            | 0.279            | 0.622            | 0.100        | 0.023 | 0.774         | 0.445 | 0.500 | 0.937 | 0.743 |
| <i>Pseudobutyrvibrio</i>  | 0.276 | 0.705 | 0.113 | 0.979 | 0.994 | 0.901 | 0.581  | 0.668            | 0.900            | 0.379            | 0.643        | 0.863 | 0.938         | 0.586 | 0.720 | 0.462 | 0.630 |
| <i>Coprobacillus</i>      | 0.759 | 0.393 | 0.762 | 0.047 | 0.276 | 0.052 | 0.287  | 0.708            | 0.254            | 0.901            | 0.078        | 0.452 | 0.638         | 0.266 | 0.782 | 0.964 | 0.780 |
| <i>Faecalibacterium</i>   | 0.787 | 0.341 | 0.398 | 0.911 | 0.651 | 0.505 | 0.585  | 0.004            | 0.972            | 0.354            | 0.756        | 0.703 | 0.015         | 0.674 | 0.071 | 0.073 | 0.084 |
| <i>Anaerobiospirillum</i> | 0.147 | 0.248 | 0.785 | 0.346 | 0.431 | 0.541 | 0.508  | 0.154            | 0.572            | 0.254            | 0.457        | 0.008 | 0.344         | 0.217 | 0.197 | 0.357 | 0.237 |
| <i>Christensenella</i>    | 0.035 | 0.045 | 0.326 | 0.298 | 0.064 | 0.567 | 0.874  | 0.091            | 0.455            | 0.261            | 0.155        | 0.619 | 0.844         | 0.783 | 0.560 | 0.205 | 0.148 |
| <i>Acholeplasma</i>       | 0.736 | 0.539 | 0.974 | 0.260 | 0.528 | 0.796 | 0.811  | 0.259            | 0.081            | 0.179            | 0.482        | 0.072 | 0.036         | 0.146 | 0.894 | 0.351 | 0.493 |
| <i>Eubacterium</i>        | 0.486 | 0.315 | 0.165 | 0.309 | 0.566 | 0.130 | 0.680  | 0.199            | 0.244            | 0.390            | 0.090        | 0.231 | 0.189         | 0.793 | 0.557 | 0.100 | 0.069 |
| <i>Flavonifractor</i>     | 0.746 | 0.160 | 0.272 | 0.394 | 0.025 | 0.611 | 0.465  | 0.771            | 0.236            | 0.734            | 0.130        | 0.632 | 0.717         | 0.550 | 0.515 | 0.380 | 0.485 |
| <i>Odoribacter</i>        | 0.067 | 0.174 | 0.099 | 0.852 | 0.402 | 0.880 | 0.400  | 0.108            | 0.257            | 0.871            | 0.360        | 0.313 | 0.789         | 0.378 | 0.200 | 0.097 | 0.250 |
| <i>Oxalobacter</i>        | 0.016 | 0.003 | 0.001 | 0.292 | 0.027 | 0.348 | 0.188  | 0.618            | 0.605            | 0.843            | 0.393        | 0.329 | 0.438         | 0.360 | 0.527 | 0.697 | 0.518 |
| <i>Clostridium_XIVa</i>   | 0.111 | 0.150 | 0.979 | 0.007 | 0.144 | 0.061 | 0.332  | 0.145            | 0.906            | 0.311            | 0.949        | 0.044 | 0.275         | 0.626 | 0.792 | 0.470 | 0.640 |
| <i>Anaerofilum</i>        | 0.695 | 0.168 | 0.026 | 0.944 | 0.897 | 0.794 | 0.468  | 0.090            | 0.748            | 0.750            | 0.136        | 0.224 | 0.692         | 0.079 | 0.203 | 0.122 | 0.202 |
| <i>Fusobacterium</i>      | 0.103 | 0.059 | 0.341 | 0.047 | 0.072 | 0.620 | 0.329  | 0.559            | 0.924            | 0.471            | 0.430        | 0.126 | 0.857         | 0.718 | 0.582 | 0.836 | 0.917 |
| <i>Collinsella</i>        | 0.102 | 0.372 | 0.018 | 0.368 | 0.473 | 0.303 | 0.792  | 0.259            | 0.511            | 0.550            | 0.018        | 0.271 | 0.744         | 0.423 | 0.011 | 0.291 | 0.360 |
| <i>Parabacteroides</i>    | 0.591 | 0.923 | 0.312 | 0.614 | 0.480 | 0.219 | 0.974  | 0.819            | 0.108            | 0.741            | 0.032        | 0.214 | 0.471         | 0.460 | 0.299 | 0.388 | 0.479 |
| <i>Alistipes</i>          | 0.540 | 0.987 | 0.159 | 0.696 | 0.177 | 0.655 | 0.976  | 0.068            | 0.573            | 0.201            | 0.118        | 0.089 | 0.424         | 0.491 | 0.749 | 0.936 | 0.985 |
| <i>Haemophilus</i>        | 0.030 | 0.299 | 0.667 | 0.854 | 0.289 | 0.486 | 0.434  | 0.736            | 0.928            | 0.636            | 0.365        | 0.948 | 0.272         | 0.246 | 0.399 | 0.583 | 0.612 |
| <i>Gemmiger</i>           | 0.697 | 0.512 | 0.458 | 0.892 | 0.753 | 0.845 | 0.873  | 0.100            | 0.789            | 0.329            | 0.263        | 0.862 | 0.828         | 0.516 | 0.893 | 0.919 | 0.846 |
| <i>Paraprevotella</i>     | 0.758 | 0.976 | 0.373 | 0.079 | 0.722 | 0.279 | 0.057  | 0.952            | 0.523            | 0.498            | 0.615        | 0.004 | 0.213         | 0.423 | 0.165 | 0.696 | 0.584 |
| <i>Holdemanella</i>       | 0.085 | 0.468 | 0.960 | 0.128 | 0.034 | 0.913 | 0.769  | 0.735            | 0.906            | 0.456            | 0.772        | 0.602 | 0.946         | 0.226 | 0.263 | 0.046 | 0.077 |
| <i>Prevotella</i>         | 0.071 | 0.452 | 0.756 | 0.235 | 0.338 | 0.048 | 0.224  | 0.328            | 0.079            | 0.760            | 0.173        | 0.329 | 0.836         | 0.610 | 0.080 | 0.845 | 0.975 |
| <i>Aggregatibacter</i>    | 0.018 | 0.116 | 0.500 | 0.206 | 0.800 | 0.355 | 0.275  | 0.035            | 0.272            | 0.766            | 0.222        | 0.040 | 0.663         | 0.840 | 0.969 | 0.741 | 0.740 |
| <i>Sutterella</i>         | 0.042 | 0.003 | 0.300 | 0.180 | 0.241 | 0.051 | 0.765  | 0.412            | 0.456            | 0.111            | 0.227        | 0.688 | 0.113         | 0.506 | 0.039 | 0.409 | 0.369 |
| <i>Unassigned</i>         | 0.413 | 0.047 | 0.752 | 0.862 | 0.423 | 0.137 | 0.628  | 0.503            | 0.518            | 0.515            | 0.014        | 0.886 | 0.838         | 0.077 | 0.046 | 0.991 | 0.467 |
| <i>Dialister</i>          | 0.080 | 0.004 | 0.403 | 0.824 | 0.531 | 0.197 | 0.567  | 0.493            | 0.133            | 0.556            | 0.029        | 0.977 | 0.836         | 0.512 | 0.301 | 0.065 | 0.130 |
| <i>Howardella</i>         | 0.319 | 0.812 | 0.761 | 0.351 | 0.184 | 0.978 | 0.797  | 0.261            | 0.120            | 0.391            | 0.657        | 0.171 | 0.140         | 0.322 | 0.188 | 0.780 | 0.893 |
| <i>Streptococcus</i>      | 0.124 | 0.743 | 0.439 | 0.900 | 0.701 | 0.875 | 0.888  | 0.231            | 0.947            | 0.420            | 0.234        | 0.237 | 0.145         | 0.417 | 0.732 | 0.313 | 0.482 |
| <i>Alloprevotella</i>     | 0.222 | 0.601 | 0.403 | 0.078 | 0.394 | 0.355 | 0.175  | 0.299            | 0.726            | 0.977            | 0.629        | 0.761 | 0.782         | 0.813 | 0.415 | 0.134 | 0.207 |
| <i>Bacteroides</i>        | 0.769 | 0.748 | 0.553 | 0.973 | 0.451 | 0.166 | 0.820  | 0.517            | 0.627            | 0.485            | 0.247        | 0.122 | 0.110         | 0.322 | 0.828 | 0.347 | 0.596 |
| <i>Veillonella</i>        | 0.015 | 0.090 | 0.831 | 0.537 | 0.577 | 0.607 | 0.669  | 0.317            | 0.632            | 0.645            | 0.179        | 0.075 | 0.062         | 0.027 | 0.944 | 0.274 | 0.524 |
| <i>Dorea</i>              | 0.189 | 0.967 | 0.641 | 0.216 | 0.868 | 0.196 | 0.311  | 0.632            | 0.582            | 0.533            | 0.878        | 0.473 | 0.047         | 0.863 | 0.550 | 0.817 | 0.614 |

**Supplementary Table 11. Diabetes bowel symptom questionnaire.**

| <b>Part A</b>                          |                                         |
|----------------------------------------|-----------------------------------------|
| <b><u>DO YOU HAVE:</u></b>             | <b><u>HOW SERIOUS (1-5 points):</u></b> |
| 1. Abdominal pain                      | _____                                   |
| 2. Pain better with bowel action       | _____                                   |
| 3. Pain after meals                    | _____                                   |
| 4. Pain before meals                   | _____                                   |
| 5. Pain better with milk               | _____                                   |
| 6. Hard stools                         | _____                                   |
| 7. Loose stools                        | _____                                   |
| 8. Faecal urgency                      | _____                                   |
| 9. Straining                           | _____                                   |
| 10. Incomplete evacuation              | _____                                   |
| 11. Flatus incontinence                | _____                                   |
| 12. Amount of Abdominal pain           | _____                                   |
| 13. Pain woke from sleep               | _____                                   |
| <b><u>DO YOU HAVE:</u></b>             | <b><u>HOW OFTEN (0-6 points):</u></b>   |
| 14. More than 3 bowel actions per day  | _____                                   |
| 15. Less than 3 bowel actions per week | _____                                   |
| 16. Manual assistance with defecation  | _____                                   |
| 17. Anal blockage                      | _____                                   |
| 18. Amount of faecal incontinence      | _____                                   |
| 19. Manual assistance with defecation  | _____                                   |
| 20. Amount of faecal incontinence      | _____                                   |
| 21. Change in bowel habit              | _____                                   |
| 22. Abdominal or bowel disease         | _____                                   |
| 23. GI surgery                         | _____                                   |
| <b>Part B</b>                          |                                         |
| <b><u>DO YOU HAVE:</u></b>             | <b><u>HOW SERIOUS (1-5 points):</u></b> |
| 24. Acid regurgitation                 | _____                                   |
| 25. Dysphagia                          | _____                                   |
| 26. Early satiety                      | _____                                   |
| 27. Vomiting                           | _____                                   |
| 28. Persistence of food in stomach     | _____                                   |
| 29. Abdominal bloating                 | _____                                   |
| 30. Abdominal distension               | _____                                   |
| 31. Loss of appetite                   | _____                                   |
| 32. Nausea                             | _____                                   |
| 33. Retching                           | _____                                   |
| 34. Heartburn                          | _____                                   |
